# Supplementary material for: Bean Cuisine: The Potential of Citizen Science to Help Motivate Changes in Pulse Knowledge and Consumption
Source: MDPI journal article supplement (doi:10.3390/foods12142667), 2023-07-11
Supplement: s1 [file s1]

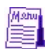

# Menu Template Nutrient Analysis

Total Days: 14  
Total Foods: 153

Avg. Daily Kcals: 2037.204  
Name: Updated Bean Cuisine

| Nutrient                     | Value    | Unit | Goal     | %     |
|------------------------------|----------|------|----------|-------|
| Weight                       | 2164.500 | g    |          |       |
| Kilocalories                 | 2037.204 | kcal | 2000.000 | 102 % |
| Kilojoules                   | 8408.354 | kJ   |          |       |
| Protein                      | 97.967   | g    | 50.000   | 196 % |
| Carbohydrate                 | 292.336  | g    | 275.000  | 106 % |
| Available Carbohydrate       | 0.017    | g    |          |       |
| Fat, Total                   | 61.611   | g    | 78.000   | 79 %  |
| Alcohol                      | 0.277    | g    |          |       |
| Cholesterol                  | 208.883  | mg   | 300.000  | 70 %  |
| Saturated Fat                | 14.817   | g    | 20.000   | 74 %  |
| Monounsaturated Fat          | 19.599   | g    |          |       |
| Polyunsaturated Fat          | 13.948   | g    |          |       |
| SFA 4:0                      | 0.220    | g    |          |       |
| SFA 6:0                      | 0.153    | g    |          |       |
| SFA 8:0                      | 0.096    | g    |          |       |
| SFA 10:0                     | 0.225    | g    |          |       |
| SFA 12:0, Lauric             | 0.247    | g    |          |       |
| SFA 14:0                     | 0.804    | g    |          |       |
| SFA 15:0 Pentadecanoic acid  | 0.049    | g    |          |       |
| SFA 24:0 Lignoceric Acid     | 0.004    | g    |          |       |
| SFA 16:0, Palmitic           | 6.976    | g    |          |       |
| SFA 17:0                     | 0.055    | g    |          |       |
| SFA 18:0, Stearic            | 2.305    | g    |          |       |
| SFA 20:0                     | 0.045    | g    |          |       |
| SFA 22:0                     | 0.017    | g    |          |       |
| MFA 14:1                     | 0.043    | g    |          |       |
| MFA 16:1                     | 0.510    | g    |          |       |
| MFA 18:1, Oleic              | 18.300   | g    |          |       |
| MFA 20:1                     | 0.170    | g    |          |       |
| MFA 22:1                     | 0.011    | g    |          |       |
| PFA 18:2, Linoleic           | 11.574   | g    |          |       |
| PFA 18:3, Linolenic          | 1.769    | g    |          |       |
| PFA 18:4                     | 0.004    | g    |          |       |
| PFA 20:4                     | 0.108    | g    |          |       |
| PFA 20:5, EPA                | 0.010    | g    |          |       |
| PFA 22:5                     | 0.009    | g    |          |       |
| PFA 22:6, DHA                | 0.041    | g    |          |       |
| Trans Fatty Acid             | 0.347    | g    |          |       |
| Sum of Trans Fat and Sat Fat | 10.419   | g    |          |       |
| Omega 3 Polyunsat Fat, Tot   | 0.000    | g    |          |       |
| Omega 6 Polyunsat Fat, Tot   | 0.000    | g    |          |       |
| Sodium                       | 2334.420 | mg   | 2300.000 | 101 % |
| Potassium                    | 5291.164 | mg   | 4700.000 | 113 % |
| Salt                         | 5.839    | g    |          |       |
| Chloride                     |          |      | 2300.000 |       |
| Vitamin A (RE)               | 1732.003 | RE   |          |       |

| Nutrient                | Value    | Unit | Goal     | %     |
|-------------------------|----------|------|----------|-------|
| Cobalamin (Vitamin B12) | 5.857    | mcg  | 2.400    | 244 % |
| Biotin                  | 20.379   | mcg  | 30.000   | 68 %  |
| Pantothenic Acid        | 5.693    | mg   | 5.000    | 114 % |
| Vitamin K               | 290.345  | mcg  | 120.000  | 242 % |
| Phosphorus              | 1543.527 | mg   | 1250.000 | 123 % |
| Iodine                  |          | mcg  | 150.000  |       |
| Magnesium               | 495.233  | mg   | 420.000  | 118 % |
| Zinc                    | 10.858   | mg   | 11.000   | 99 %  |
| Copper                  | 1.979    | mg   | 0.900    | 220 % |
| Manganese               | 4.740    | mg   | 2.300    | 206 % |
| Selenium                | 81.964   | mcg  | 55.000   | 149 % |
| Fluoride                | 76.611   | mcg  |          |       |
| Chromium                | 0.051    | mg   | 0.035    | 145 % |
| Molybdenum              | 33.562   | mcg  | 45.000   | 75 %  |
| Choline                 | 366.456  | mg   | 550.000  | 67 %  |
| Chlorine                |          | mg   |          |       |
| Sulfur                  |          | mg   |          |       |
| Cobalt                  |          | mcg  |          |       |
| Boron                   |          | mcg  |          |       |
| Nickel                  |          | mcg  |          |       |
| Dietary Fiber, Total    | 61.370   | g    | 28.000   | 219 % |
| Soluble Fiber           | 2.826    | g    |          |       |
| Insoluble Fiber         | 4.471    | g    |          |       |
| Crude Fiber             | 20.556   | g    |          |       |
| Sugar, Total            | 88.964   | g    |          |       |
| Added Sugars            | 11.963   | g    | 50.000   | 24 %  |
| Glucose                 | 19.675   | g    |          |       |
| Galactose               | 1.264    | g    |          |       |
| Fructose                | 22.073   | g    |          |       |
| Sucrose                 | 19.759   | g    |          |       |
| Lactose                 | 7.880    | g    |          |       |
| Maltose                 | 0.872    | g    |          |       |
| Sugar Alcohol           | 0.000    | g    |          |       |
| Other Carbohydrate      | 0.000    | g    |          |       |
| Sorbitol                | 0.000    | g    |          |       |
| Xylitol                 | 0.000    | g    |          |       |
| Inositol                |          | mg   |          |       |
| Tryptophan              | 879.547  | mg   |          |       |
| Threonine               | 2994.376 | mg   |          |       |
| Isoleucine              | 3357.981 | mg   |          |       |
| Leucine                 | 5914.066 | mg   |          |       |
| Lysine                  | 5212.733 | mg   |          |       |
| Methionine              | 1423.305 | mg   |          |       |
| Cystine                 | 883.886  | mg   |          |       |
| Phenylalanine           | 3713.392 | mg   |          |       |
| Tyrosine                | 2417.148 | mg   |          |       |
| Valine                  | 4034.569 | mg   |          |       |
| Arginine                | 4643.135 | mg   |          |       |

## Nutrient Goal Template

DAILY VALUES/RDI - ADULT/CHILD

Analyzed by  
Updated Bean Cuisine

| Exchanges          |      |
|--------------------|------|
| Bread/Starch       | 2.00 |
| Fat                | 0.50 |
| Fruit              | 3.00 |
| Meat-High Fat      | 0.00 |
| Meat-Medium Fat    | 0.00 |
| Meat-Very Lean     | 0.00 |
| Milk-Skim          | 0.50 |
| Other Carbohydrate | 0.00 |
| Vegetables         | 1.00 |

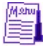

# Menu Template Nutrient Analysis

**Total Days:** 14  
**Total Foods:** 153

**Avg. Daily Kcals:** 2037.204  
**Name:** Updated Bean Cuisine

| Nutrient                     | Value     | Unit | Goal     | %     | Nutrient                   | Value     | Unit | Goal | % |
|------------------------------|-----------|------|----------|-------|----------------------------|-----------|------|------|---|
| Vitamin A (IU)               | 15483.060 | IU   | 5000.000 | 310 % | Histidine                  | 2045.495  | mg   |      |   |
| Vitamin A (RAE)              | 1866.441  | mcg  | 900.000  | 207 % | Alanine                    | 3488.060  | mg   |      |   |
| Total Carotenoid             | 0.000     | RE   |          |       | Aspartic Acid              | 8073.089  | mg   |      |   |
| Beta-Carotene                | 9282.536  | mcg  |          |       | Glutamic Acid              | 13015.740 | mg   |      |   |
| Alpha-Carotene               | 1485.779  | mcg  |          |       | Glycine                    | 2948.158  | mg   |      |   |
| Lutein (+ Zeaxanthin)        | 4921.319  | mcg  |          |       | Proline                    | 4166.004  | mg   |      |   |
| Beta-Cryptoxanthin           | 190.685   | mcg  |          |       | Serine                     | 3827.826  | mg   |      |   |
| Lycopene                     | 8809.182  | mcg  |          |       | Glutamine                  | 0.000     | mg   |      |   |
| Vitamin C                    | 199.495   | mg   | 90.000   | 222 % | Taurine                    | 0.000     | mg   |      |   |
| Calcium                      | 1494.483  | mg   | 1300.000 | 115 % | Hydroxyproline             | 24.793    | mg   |      |   |
| Iron                         | 20.424    | mg   | 18.000   | 113 % | Cysteine                   | 0.000     | mg   |      |   |
| Vitamin D (ug)               | 7.463     | mcg  | 20.000   | 37 %  | Moisture                   | 1419.933  | g    |      |   |
| Vitamin D (IU)               | 301.091   | IU   | 400.000  | 75 %  | Ash                        | 17.377    | g    |      |   |
| Vitamin E (mg)               | 0.273     | mg   | 20.000   | 1 %   | Caffeine                   | 2.859     | mg   |      |   |
| Vitamin E (IU)               | 0.406     | IU   | 30.000   | 1 %   | Osmolality                 |           | mo   |      |   |
| Vitamin E (Alpha-Tocopherol) | 10.528    | mg   | 15.000   | 70 %  | Theobromine                | 25.566    | mg   |      |   |
| Beta Tocopherol              | 0.116     | mg   |          |       | Betaine                    | 24.253    | mg   |      |   |
| Gamma Tocopherol             | 3.062     | mg   |          |       | Phytosterols               | 50.365    | mg   |      |   |
| Delta Tocopherol             | 0.286     | mg   |          |       | Stigmasterol               | 1.308     | mg   |      |   |
| Alpha Tocotrienol            | 0.219     | mg   |          |       | Campesterol                | 2.715     | mg   |      |   |
| Beta Tocotrienol             | 0.331     | mg   |          |       | Beta-sitosterol            | 22.213    | mg   |      |   |
| Gamma Tocotrienol            | 0.265     | mg   |          |       | Epigallocatechin-3-gallate |           | mg   |      |   |
| Delta Tocotrienol            | 0.008     | mg   |          |       | Daidzein                   | 0.018     | mg   |      |   |
| Thiamin                      | 2.729     | mg   | 1.200    | 227 % | Genistein                  | 0.029     | mg   |      |   |
| Riboflavin                   | 2.972     | mg   | 1.300    | 229 % | Glycitein                  | 0.000     | mg   |      |   |
| Niacin                       | 15.197    | mg   | 20.000   | 76 %  | Total isoflavones          | 0.053     | mg   |      |   |
| Niacin Equivalent            | 32.431    | mg   | 16.000   | 203 % | Biochanin A                | 0.090     | mg   |      |   |
| Pyridoxine (Vitamin B6)      | 2.748     | mg   | 1.700    | 162 % | Formononetin               | 0.014     | mg   |      |   |
| Folate (Total)               | 791.023   | mcg  | 400.000  | 198 % | Coumestrol                 | 0.001     | mg   |      |   |
| Folate (DFE)                 | 951.461   | mcg  | 400.000  | 238 % |                            |           |      |      |   |
| Folic Acid                   | 107.096   | mcg  |          |       |                            |           |      |      |   |
| Food Folate                  | 774.177   | mcg  |          |       |                            |           |      |      |   |
