# Supplementary material for: Bean Cuisine: The Potential of Citizen Science to Help Motivate Changes in Pulse Knowledge and Consumption
Source: MDPI journal article supplement (doi:10.3390/foods12142667), 2023-07-11
Supplement: s1 [file s1]

| <b>Dietary Pattern</b>                             | <b>N (out of 56)</b> | <b>Percent</b> |
|----------------------------------------------------|----------------------|----------------|
| Omnivore                                           | 39                   | 69.6           |
| Pescatarian                                        | 5                    | 8.9            |
| Vegetarian                                         | 8                    | 14.3           |
| Vegan                                              | 4                    | 7.1            |
| <b>Gender</b>                                      |                      |                |
| Female                                             | 54                   | 96.4           |
| Male                                               | 2                    | 3.6            |
| <b>Age</b>                                         |                      |                |
| 21-29                                              | 3                    | 5.4            |
| 30-39                                              | 4                    | 7.1            |
| 40-49                                              | 7                    | 12.5           |
| 50-59                                              | 15                   | 26.8           |
| 60-69                                              | 19                   | 33.9           |
| 70-79                                              | 7                    | 12.5           |
| Prefer not to say                                  | 1                    | 1.8            |
| <b>Hispanic</b>                                    |                      |                |
| Hispanic                                           | 1                    | 1.8            |
| Non-Hispanic                                       | 55                   | 98.2           |
| <b>Ethnicity</b>                                   |                      |                |
| Asian                                              | 1                    | 1.8            |
| Native American                                    | 1                    | 1.8            |
| Caucasian                                          | 53                   | 94.6           |
| Asian-Caucasian                                    | 1                    | 1.8            |
| <b>Highest education level</b>                     |                      |                |
| Some college degree, no credit                     | 2                    | 3.6            |
| Trade/technical/vocational training                | 1                    | 1.8            |
| Associate degree                                   | 1                    | 1.8            |
| Bachelor's degree, completed or currently enrolled | 24                   | 42.9           |
| Master's degree, completed or currently enrolled   | 22                   | 39.3           |
| Professional degree                                | 3                    | 5.4            |
| Doctoral degree, completed or currently enrolled   | 3                    | 5.4            |
| <b>Region in the US</b>                            |                      |                |
| West Coast                                         | 4                    | 7.1            |
| Rocky Mountain (all Colorado)                      | 44                   | 78.6           |

|              |   |     |
|--------------|---|-----|
| Southwest    | 2 | 3.6 |
| South        | 2 | 3.6 |
| Mid-Atlantic | 4 | 7.1 |

---

**Appendix 4.** Citizen scientist demographics. For “Region in the US”, West Coast included participants from California (N = 2) and Oregon (N = 2); Rocky Mountain participants were all from Colorado (N = 44); Southwest included Nevada (N = 1) and Texas (N = 1); South included participants from Virginia (N = 1) and Kentucky (N = 1); and Mid-Atlantic included participants from New York (N = 2), Delaware (N = 1), and New Jersey (N = 1).
