# Supplementary material for: Bean Cuisine: The Potential of Citizen Science to Help Motivate Changes in Pulse Knowledge and Consumption
Source: MDPI journal article supplement (doi:10.3390/foods12142667), 2023-07-11
Supplement: s1 [file s1]

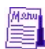

# Menu Template Meals Report

Total Days: 14

Total Foods: 151

Avg. Daily Kcals: 1999.343

Name: Original Bean Cuisine

|       | Breakfast                                                                                                                                           | Lunch                                                                                   | Dinner                                             | Morning Snack | Afternoon Snack                                                                                                                                         | Evening Snack |
|-------|-----------------------------------------------------------------------------------------------------------------------------------------------------|-----------------------------------------------------------------------------------------|----------------------------------------------------|---------------|---------------------------------------------------------------------------------------------------------------------------------------------------------|---------------|
| Day 1 | Chickpea Flour Scramble<br><br>Avocado, California<br><br>Yogurt, Plain, Low Fat (12 grams protein per 8 ounces)<br>Banana<br><br>Milk, Low Fat, 1% | Multi-Bean Salad<br><br>Orange<br><br>PLANET OAT Milk, Oatmilk, Original                | Zesty Salsa<br>Chicken Pulse Pasta<br>Garden Salad |               | Olive Bean Dip<br><br>WHEAT THINS Crackers, Hint of Salt<br>SILK Plus Omega-3 DHA, soymilk<br><br>DOVE PROMISES Candy Bar, Dark Chocolate, Silky Smooth |               |
| Day 2 | Chocolate Black Bean Smoothie<br><br>Eggs, Hard Boiled                                                                                              | Bean and Tuna Salad Sandwich<br><br>Carrots, Baby<br><br>SILK Plus Omega-3 DHA, soymilk | Bean and Quinoa Harvest Salad<br>Blueberries       |               | Crispy Chickpeas<br><br>Almonds, Dry Roasted, without Salt Added<br>PLANET OAT Milk, Oatmilk, Original<br>Dates, Medjool                                |               |



# Menu Template Meals Report

Total Days: 14

Total Foods: 151

Avg. Daily Kcals: 1999.343

Name: Pulse Cuisine\_v1\_ORIGINAL

|       | Breakfast                                                                                                                                   | Lunch                                                                                                         | Dinner                                                                                                    | Morning Snack | Afternoon Snack                                                                                                | Evening Snack |
|-------|---------------------------------------------------------------------------------------------------------------------------------------------|---------------------------------------------------------------------------------------------------------------|-----------------------------------------------------------------------------------------------------------|---------------|----------------------------------------------------------------------------------------------------------------|---------------|
| Day 3 | Apple<br>Cinnamon Lentil<br>Porridge<br><br>Yogurt, Plain,<br>Low Fat (12<br>grams protein<br>per 8 ounces)<br>Strawberries<br>(Strawberry) | Bean and<br>Cheese Burrito<br><br>Watermelon<br><br>Juice, Lime                                               | Ginger Chicken<br>and Beans<br><br>Rice, Brown,<br>Medium Grain,<br>Cooked<br><br>Grapes, Red or<br>Green |               | Black Bean<br>Brownie<br><br>PLANET OAT<br>Milk, Oatmilk,<br>Original                                          |               |
| Day 4 | Carrot Cake<br>White Bean<br>Oatmeal<br>PLANET OAT<br>Milk, Oatmilk,<br>Original                                                            | White Bean<br>Waldorf Salad<br><br>Garden Salad<br>with Chicken<br><br>Orange                                 | Bean and<br>Sweet Potato<br>Bake<br>Eggs, Fried                                                           |               | Savory<br>Chickpea Bread<br><br>Yogurt, Plain,<br>Low Fat (12<br>grams protein<br>per 8 ounces)<br>Blueberries |               |
| Day 5 | Easy Baked<br>Beans on Toast<br>Orange<br><br><br><br>Milk, Low Fat,<br>1%                                                                  | Rocky Mountain<br>"Caviar"<br>FOOD<br>SHOULD<br>TASTE GOOD<br>Chips, Tortilla,<br>Multigrain<br>Apple, Medium | Lentil Curry<br><br>Broccoli<br><br><br>Strawberries<br>(Strawberry)                                      |               | Buffalo<br>Chickpea Dip<br>Celery, Stalk<br><br><br>Carrots                                                    |               |

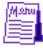

# Menu Template Meals Report

Total Days: 14

Total Foods: 151

Avg. Daily Kcals: 1999.343

Name: Pulse Cuisine\_v1\_ORIGINAL

|       | Breakfast                                                                                                                 | Lunch                                                                                                     | Dinner                                    | Morning Snack | Afternoon Snack                                                                                                                         | Evening Snack |
|-------|---------------------------------------------------------------------------------------------------------------------------|-----------------------------------------------------------------------------------------------------------|-------------------------------------------|---------------|-----------------------------------------------------------------------------------------------------------------------------------------|---------------|
|       |                                                                                                                           |                                                                                                           | SILK Plus<br>Omega-3 DHA,<br>soymilk      |               | Dates, Medjool                                                                                                                          |               |
| Day 6 | Chickpea Flour<br>Everything<br>Bagel Muffins<br>Grapefruit, Pink<br>or Red<br><br>SILK Plus<br>Omega-3 DHA,<br>soymilk   | Black Bean<br>Salad<br><br>Eggs, Hard<br>Boiled<br><br>Kiwi Fruit,<br>Green or<br>Chinese<br>Gooseberries | Bean and<br>Turkey<br>Quesadilla<br>Salsa |               | Peanut Butter<br>White Bean<br>Blondie<br>PLANET OAT<br>Milk, Oatmilk,<br>Original                                                      |               |
| Day 7 | Pinto Bean<br>Shakshuka<br>Bread, Pita,<br>Whole Wheat<br>Yogurt, Plain,<br>Low Fat (12<br>grams protein<br>per 8 ounces) | Herby Bean<br>Toast<br>Garden Salad<br><br>PLANET OAT<br>Milk, Oatmilk,<br>Original                       | White Bean<br>Chicken Chili<br>Orange     |               | Artichoke Bean<br>Dip<br>Pepper, Bell or<br>Sweet, Red<br>DOVE<br>PROMISES<br>Candy Bar,<br>Dark Chocolate,<br>Silky Smooth<br>Cucumber |               |
| Day 8 | Strawberry<br>Banana Bean<br>Smoothie                                                                                     | Bean and Rice<br>Salad                                                                                    | Lentil, Broccoli,<br>and Shrimp<br>Bake   |               | Pinto Pumpkin<br>Dip                                                                                                                    |               |



# Menu Template Meals Report

Total Days: 14

Total Foods: 151

Avg. Daily Kcals: 1999.343

Name: Pulse Cuisine\_v1\_ORIGINAL

|        | Breakfast                                                          | Lunch                                                                                       | Dinner                                                                          | Morning Snack | Afternoon Snack                                                        | Evening Snack |
|--------|--------------------------------------------------------------------|---------------------------------------------------------------------------------------------|---------------------------------------------------------------------------------|---------------|------------------------------------------------------------------------|---------------|
|        | Peanuts, dry roasted, without salt                                 | SILK Plus Omega-3 DHA, soymilk<br>Dates, Medjool                                            | Potatoes, Sweet, Baked in Skin<br>Cottage Cheese, Low Fat 1%<br>Chives, Chopped |               | Pepper, Bell or Sweet, Green<br><br>PLANET OAT Milk, Oatmilk, Original |               |
| Day 9  | Chickpea Dutch Baby<br>PLANET OAT Milk, Oatmilk, Original          | Lentil Tacos<br><br>Yogurt, Plain, Low Fat (12 grams protein per 8 ounces)<br>Mango         | Chicken and Bean Cassoulet<br>Blueberries                                       |               | Snickerdoodle<br>Hummus<br>Apple, Medium                               |               |
| Day 10 | Black Bean Breakfast Burrito<br><br>SILK Plus Omega-3 DHA, soymilk | Mediterranean Chickpea Salad<br><br>Carrots, Baby<br><br>PLANET OAT Milk, Oatmilk, Original | Pinto and Ham Soup<br><br>Bread, 100% Whole Wheat                               |               | Chocolate Cherry<br>Mayocoba Bean Bars<br>Grapefruit, Pink or Red      |               |



# Menu Template Meals Report

Total Days: 14

Total Foods: 151

Avg. Daily Kcals: 1999.343

Name: Pulse Cuisine\_v1\_ORIGINAL

|        | Breakfast                                                                                    | Lunch                                                                                                              | Dinner                                                             | Morning Snack | Afternoon Snack                                                    | Evening Snack |
|--------|----------------------------------------------------------------------------------------------|--------------------------------------------------------------------------------------------------------------------|--------------------------------------------------------------------|---------------|--------------------------------------------------------------------|---------------|
| Day 11 | Savory Chickpea Waffle<br><br>Banana<br><br>PLANET OAT Milk, Oatmilk, Original               | Super Simple Pinto Bean Burger<br><br>Orange                                                                       | Chicken and Pasta with Beans<br><br>SILK Plus Omega-3 DHA, soymilk |               | Split Pea Hummus<br><br>Cauliflower, Chopped<br><br>Dates, Medjool |               |
| Day 12 | Blueberry Banana White Bean Oats<br>PLANET OAT Milk, Oatmilk, Original                       | Beany Salad Wrap<br><br>Watermelon<br><br>SILK Plus Omega-3 DHA, soymilk                                           | Eggy Lentil Pasta<br><br>Grapes, Red or Green                      |               | Mayocoba Cookie Dough Dip<br>Crackers, Graham, Plain               |               |
| Day 13 | Chickpea Flour Frittata<br><br>Grapefruit, Pink or Red<br>PLANET OAT Milk, Oatmilk, Original | Mayocoba Stuffed Sweet Potatoes with Tahini Yogurt Sauce<br>Grapes, Red or Green<br>SILK Plus Omega-3 DHA, soymilk | Turkey and Bean Skillet<br><br>Juice, Lime                         |               | Lentil Bruschetta with Tomatoes, Basil, and Feta                   |               |



# Menu Template Meals Report

Total Days: 14

Total Foods: 151

Avg. Daily Kcals: 1999.343

Name: Pulse Cuisine\_v1\_ORIGINAL

|        | Breakfast                                                                         | Lunch                                                   | Dinner                                                     | Morning Snack | Afternoon Snack                                                                                                                 | Evening Snack |
|--------|-----------------------------------------------------------------------------------|---------------------------------------------------------|------------------------------------------------------------|---------------|---------------------------------------------------------------------------------------------------------------------------------|---------------|
| Day 14 | Beany<br>Breakfast Hash<br><br>Banana<br><br>SILK Plus<br>Omega-3 DHA,<br>soymilk | Bean and Rice<br>Soup<br><br>Bread, 100%<br>Whole Wheat | Summery Split<br>Pea and<br>Tomato Salad<br><br>Watermelon |               | Black Bean<br>Chocolate<br>Mousse<br><br>Strawberries<br>(Strawberry)<br>Crackers,<br>Graham, Plain<br><br>Milk, Low Fat,<br>1% |               |
