# Supplementary material for: Bean Cuisine: The Potential of Citizen Science to Help Motivate Changes in Pulse Knowledge and Consumption
Source: MDPI journal article supplement (doi:10.3390/foods12142667), 2023-07-11
Supplement: s1 [file s1]

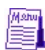

# Menu Template Nutrient Analysis

Total Days: 14  
Total Foods: 151

Avg. Daily Kcals: 1999.343  
Name: Original Bean Cuisine

| Nutrient                     | Value    | Unit | Goal     | %     |
|------------------------------|----------|------|----------|-------|
| Weight                       | 2143.808 | g    |          |       |
| Kilocalories                 | 1999.343 | kcal | 2000.000 | 100 % |
| Kilojoules                   | 8262.630 | kJ   |          |       |
| Protein                      | 95.639   | g    | 50.000   | 191 % |
| Carbohydrate                 | 291.866  | g    | 275.000  | 106 % |
| Available Carbohydrate       | 0.017    | g    |          |       |
| Fat, Total                   | 58.682   | g    | 78.000   | 75 %  |
| Alcohol                      | 0.249    | g    |          |       |
| Cholesterol                  | 209.187  | mg   | 300.000  | 70 %  |
| Saturated Fat                | 14.324   | g    | 20.000   | 72 %  |
| Monounsaturated Fat          | 17.924   | g    |          |       |
| Polyunsaturated Fat          | 13.644   | g    |          |       |
| SFA 4:0                      | 0.225    | g    |          |       |
| SFA 6:0                      | 0.151    | g    |          |       |
| SFA 8:0                      | 0.094    | g    |          |       |
| SFA 10:0                     | 0.219    | g    |          |       |
| SFA 12:0, Lauric             | 0.238    | g    |          |       |
| SFA 14:0                     | 0.767    | g    |          |       |
| SFA 15:0 Pentadecanoic acid  | 0.039    | g    |          |       |
| SFA 24:0 Lignoceric Acid     | 0.003    | g    |          |       |
| SFA 16:0, Palmitic           | 6.742    | g    |          |       |
| SFA 17:0                     | 0.052    | g    |          |       |
| SFA 18:0, Stearic            | 2.286    | g    |          |       |
| SFA 20:0                     | 0.041    | g    |          |       |
| SFA 22:0                     | 0.014    | g    |          |       |
| MFA 14:1                     | 0.032    | g    |          |       |
| MFA 16:1                     | 0.481    | g    |          |       |
| MFA 18:1, Oleic              | 16.754   | g    |          |       |
| MFA 20:1                     | 0.160    | g    |          |       |
| MFA 22:1                     | 0.010    | g    |          |       |
| PFA 18:2, Linoleic           | 11.382   | g    |          |       |
| PFA 18:3, Linolenic          | 1.799    | g    |          |       |
| PFA 18:4                     | 0.004    | g    |          |       |
| PFA 20:4                     | 0.104    | g    |          |       |
| PFA 20:5, EPA                | 0.010    | g    |          |       |
| PFA 22:5                     | 0.008    | g    |          |       |
| PFA 22:6, DHA                | 0.041    | g    |          |       |
| Trans Fatty Acid             | 0.328    | g    |          |       |
| Sum of Trans Fat and Sat Fat | 9.876    | g    |          |       |
| Omega 3 Polyunsat Fat, Tot   | 0.000    | g    |          |       |
| Omega 6 Polyunsat Fat, Tot   | 0.000    | g    |          |       |
| Sodium                       | 1933.959 | mg   | 2300.000 | 84 %  |
| Potassium                    | 5142.688 | mg   | 4700.000 | 109 % |
| Salt                         | 4.838    | g    |          |       |
| Chloride                     |          |      | 2300.000 |       |
| Vitamin A (RE)               | 1658.216 | RE   |          |       |

| Nutrient                | Value    | Unit | Goal     | %     |
|-------------------------|----------|------|----------|-------|
| Cobalamin (Vitamin B12) | 6.261    | mcg  | 2.400    | 261 % |
| Biotin                  | 21.298   | mcg  | 30.000   | 71 %  |
| Pantothenic Acid        | 5.505    | mg   | 5.000    | 110 % |
| Vitamin K               | 267.241  | mcg  | 120.000  | 223 % |
| Phosphorus              | 1524.381 | mg   | 1250.000 | 122 % |
| Iodine                  |          | mcg  | 150.000  |       |
| Magnesium               | 498.766  | mg   | 420.000  | 119 % |
| Zinc                    | 10.911   | mg   | 11.000   | 99 %  |
| Copper                  | 1.978    | mg   | 0.900    | 220 % |
| Manganese               | 4.759    | mg   | 2.300    | 207 % |
| Selenium                | 81.934   | mcg  | 55.000   | 149 % |
| Fluoride                | 75.690   | mcg  |          |       |
| Chromium                | 0.048    | mg   | 0.035    | 138 % |
| Molybdenum              | 40.987   | mcg  | 45.000   | 91 %  |
| Choline                 | 372.470  | mg   | 550.000  | 68 %  |
| Chlorine                |          | mg   |          |       |
| Sulfur                  |          | mg   |          |       |
| Cobalt                  |          | mcg  |          |       |
| Boron                   |          | mcg  |          |       |
| Nickel                  |          | mcg  |          |       |
| Dietary Fiber, Total    | 61.469   | g    | 28.000   | 220 % |
| Soluble Fiber           | 2.762    | g    |          |       |
| Insoluble Fiber         | 4.571    | g    |          |       |
| Crude Fiber             | 19.461   | g    |          |       |
| Sugar, Total            | 88.943   | g    |          |       |
| Added Sugars            | 11.893   | g    | 50.000   | 24 %  |
| Glucose                 | 19.790   | g    |          |       |
| Galactose               | 1.262    | g    |          |       |
| Fructose                | 21.934   | g    |          |       |
| Sucrose                 | 20.247   | g    |          |       |
| Lactose                 | 7.737    | g    |          |       |
| Maltose                 | 0.863    | g    |          |       |
| Sugar Alcohol           | 0.000    | g    |          |       |
| Other Carbohydrate      | 0.000    | g    |          |       |
| Sorbitol                | 0.000    | g    |          |       |
| Xylitol                 | 0.000    | g    |          |       |
| Inositol                |          | mg   |          |       |
| Tryptophan              | 848.866  | mg   |          |       |
| Threonine               | 2911.142 | mg   |          |       |
| Isoleucine              | 3269.393 | mg   |          |       |
| Leucine                 | 5749.628 | mg   |          |       |
| Lysine                  | 5077.066 | mg   |          |       |
| Methionine              | 1354.678 | mg   |          |       |
| Cystine                 | 869.929  | mg   |          |       |
| Phenylalanine           | 3636.166 | mg   |          |       |
| Tyrosine                | 2320.688 | mg   |          |       |
| Valine                  | 3931.118 | mg   |          |       |
| Arginine                | 4561.384 | mg   |          |       |

**Nutrient Goal Template**  
DAILY VALUES/RDI - ADULT/CHILD

**Analyzed by**  
Original Bean Cuisine

|                    |      |
|--------------------|------|
| <b>Exchanges</b>   |      |
| Bread/Starch       | 2.00 |
| Fat                | 0.50 |
| Fruit              | 3.00 |
| Meat-High Fat      | 0.00 |
| Meat-Medium Fat    | 0.00 |
| Meat-Very Lean     | 0.00 |
| Milk-Skim          | 0.50 |
| Other Carbohydrate | 0.00 |
| Vegetables         | 1.00 |

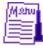

# Menu Template Nutrient Analysis

Total Days: 14  
Total Foods: 151

Avg. Daily Kcals: 1999.343  
Name: Original Bean Cuisine

| Nutrient                     | Value     | Unit | Goal     | %     | Nutrient                   | Value     | Unit | Goal | % |
|------------------------------|-----------|------|----------|-------|----------------------------|-----------|------|------|---|
| Vitamin A (IU)               | 14800.530 | IU   | 5000.000 | 296 % | Histidine                  | 1994.016  | mg   |      |   |
| Vitamin A (RAE)              | 1866.178  | mcg  | 900.000  | 207 % | Alanine                    | 3392.822  | mg   |      |   |
| Total Carotenoid             | 0.000     | RE   |          |       | Aspartic Acid              | 7924.574  | mg   |      |   |
| Beta-Carotene                | 8930.838  | mcg  |          |       | Glutamic Acid              | 12651.570 | mg   |      |   |
| Alpha-Carotene               | 1732.957  | mcg  |          |       | Glycine                    | 2884.937  | mg   |      |   |
| Lutein (+ Zeaxanthin)        | 4636.036  | mcg  |          |       | Proline                    | 4020.810  | mg   |      |   |
| Beta-Cryptoxanthin           | 187.945   | mcg  |          |       | Serine                     | 3746.584  | mg   |      |   |
| Lycopene                     | 7268.183  | mcg  |          |       | Glutamine                  | 0.000     | mg   |      |   |
| Vitamin C                    | 193.251   | mg   | 90.000   | 215 % | Taurine                    | 0.000     | mg   |      |   |
| Calcium                      | 1450.116  | mg   | 1300.000 | 112 % | Hydroxyproline             | 24.793    | mg   |      |   |
| Iron                         | 20.203    | mg   | 18.000   | 112 % | Cysteine                   | 0.000     | mg   |      |   |
| Vitamin D (ug)               | 7.556     | mcg  | 20.000   | 38 %  | Moisture                   | 1427.764  | g    |      |   |
| Vitamin D (IU)               | 304.746   | IU   | 400.000  | 76 %  | Ash                        | 16.082    | g    |      |   |
| Vitamin E (mg)               | 0.269     | mg   | 20.000   | 1 %   | Caffeine                   | 3.401     | mg   |      |   |
| Vitamin E (IU)               | 0.401     | IU   | 30.000   | 1 %   | Osmolality                 |           | mo   |      |   |
| Vitamin E (Alpha-Tocopherol) | 10.357    | mg   | 15.000   | 69 %  | Theobromine                | 30.414    | mg   |      |   |
| Beta Tocopherol              | 0.098     | mg   |          |       | Betaine                    | 23.225    | mg   |      |   |
| Gamma Tocopherol             | 2.232     | mg   |          |       | Phytosterols               | 48.141    | mg   |      |   |
| Delta Tocopherol             | 0.218     | mg   |          |       | Stigmasterol               | 1.428     | mg   |      |   |
| Alpha Tocotrienol            | 0.212     | mg   |          |       | Campesterol                | 3.595     | mg   |      |   |
| Beta Tocotrienol             | 0.289     | mg   |          |       | Beta-sitosterol            | 22.840    | mg   |      |   |
| Gamma Tocotrienol            | 0.257     | mg   |          |       | Epigallocatechin-3-gallate |           | mg   |      |   |
| Delta Tocotrienol            | 0.006     | mg   |          |       | Daidzein                   | 0.015     | mg   |      |   |
| Thiamin                      | 3.083     | mg   | 1.200    | 257 % | Genistein                  | 0.028     | mg   |      |   |
| Riboflavin                   | 3.273     | mg   | 1.300    | 252 % | Glycitein                  | 0.000     | mg   |      |   |
| Niacin                       | 14.902    | mg   | 20.000   | 75 %  | Total isoflavones          | 0.050     | mg   |      |   |
| Niacin Equivalent            | 32.267    | mg   | 16.000   | 202 % | Biochanin A                | 0.089     | mg   |      |   |
| Pyridoxine (Vitamin B6)      | 2.867     | mg   | 1.700    | 169 % | Formononetin               | 0.014     | mg   |      |   |
| Folate (Total)               | 805.451   | mcg  | 400.000  | 201 % | Coumestrol                 | 0.001     | mg   |      |   |
| Folate (DFE)                 | 1010.164  | mcg  | 400.000  | 253 % |                            |           |      |      |   |
| Folic Acid                   | 133.862   | mcg  |          |       |                            |           |      |      |   |
| Food Folate                  | 786.102   | mcg  |          |       |                            |           |      |      |   |
