# Supplementary material for: Bean Cuisine: The Potential of Citizen Science to Help Motivate Changes in Pulse Knowledge and Consumption
Source: Foods. 2023 Jul 11;12(14):2667. doi: 10.3390/foods12142667 (PMC10379374; doi:10.3390/foods12142667)
Supplement: Supplementary file 1 [file foods-12-02667-s001.zip]

Archive with 6 entries (6 files):
- Supplementary Materials S1 - Original Bean Cuisine - Nutrient Analysis.pdf
- Supplementary Materials S2 - Bean Cuisine - Meals Report.pdf
- Supplementary Materials S3 - Bean Cuisine - Citizen Scientist Intake Form.pdf
- Supplementary Materials S4 - Bean Cuisine - Citizen Scientist Feedback Form.pdf
- Supplementary Materials S5 - Citizen Scientist Demographics.pdf
- Supplementary Materials S6 - Updated Bean Cuisine - Nutrient Analysis.pdf
